# Supplementary material
Source: PubMed Central journal article supplement (PMC9040083)

Naïve  
SBP  
RMT

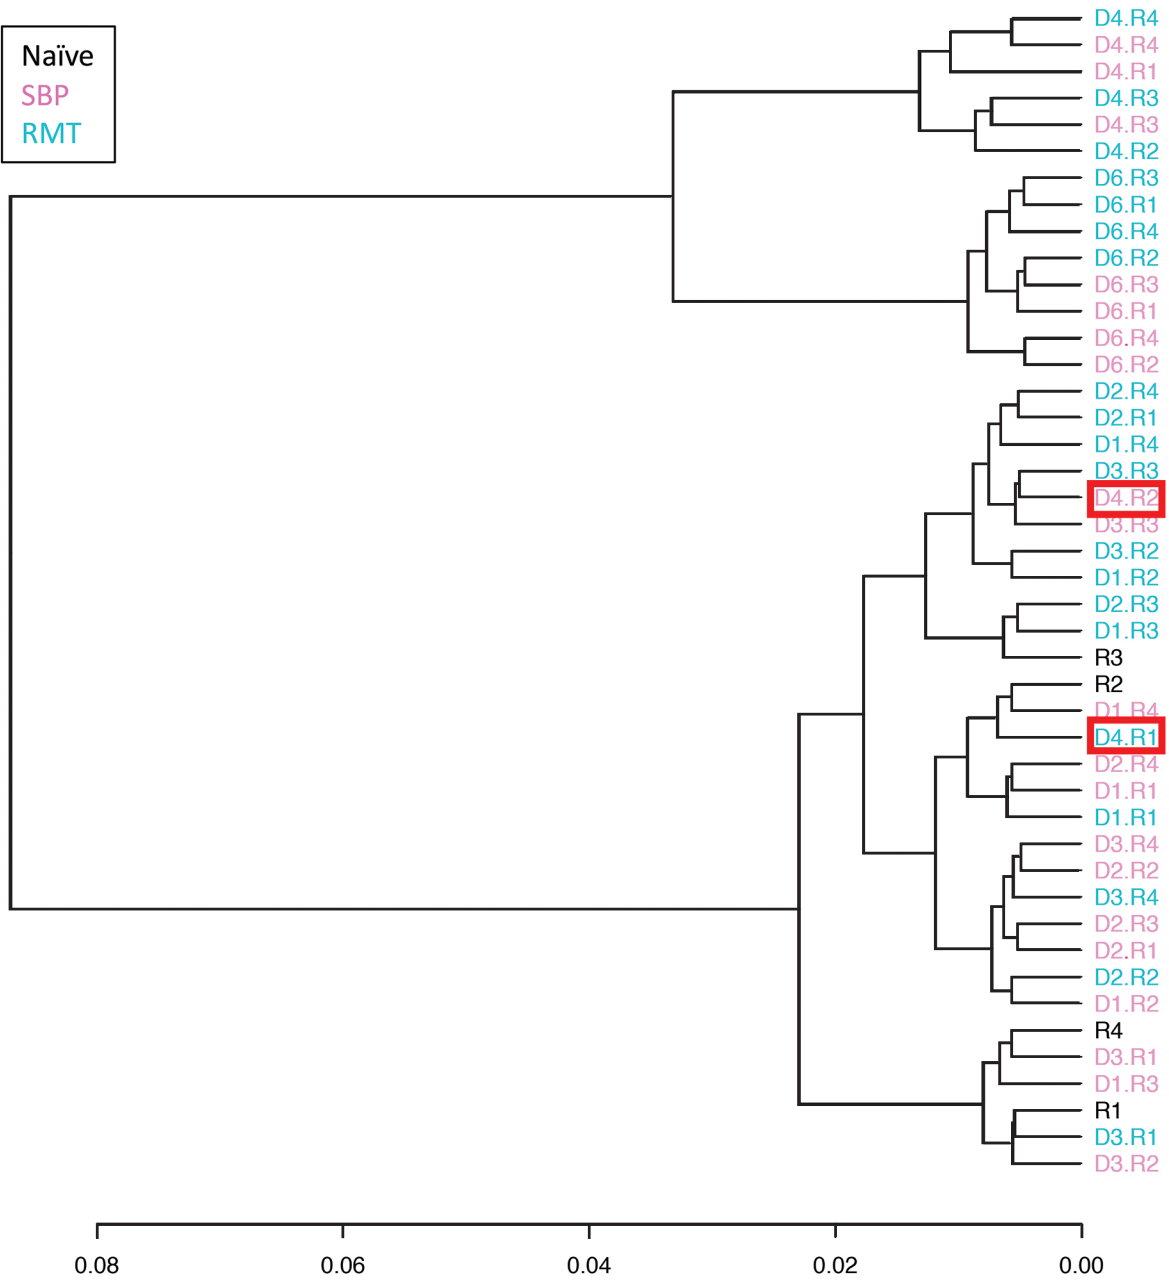

Supplement: mmc1.pdf [file mmc1.pdf]
