# Supplementary material
Source: PubMed Central journal article supplement (PMC9040083)

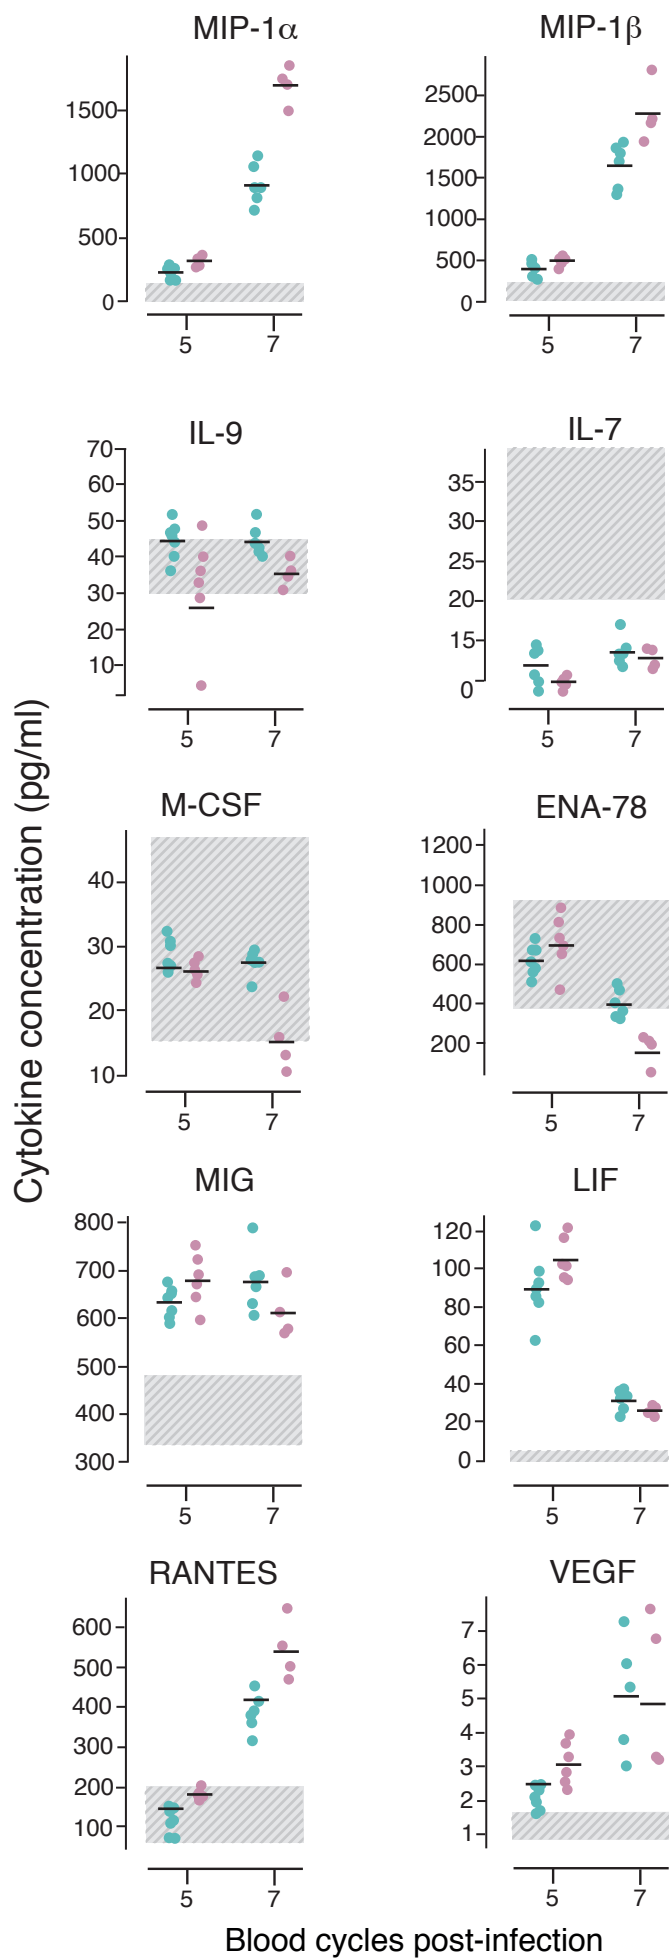

Supplement: mmc7.pdf [file mmc7.pdf]
