# Supplementary material
Source: PubMed Central journal article supplement (PMC9040083)

**A**

Gated on single live leukocytes

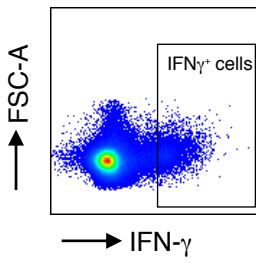Gated on IFN- $\gamma$ <sup>+</sup> cells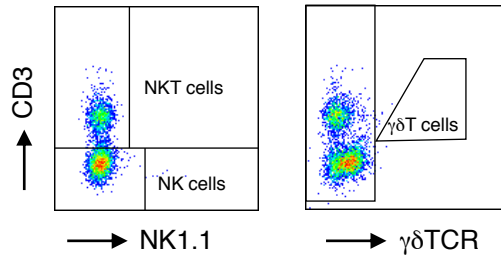Gated on CD3<sup>+</sup> NK1.1<sup>-</sup> cells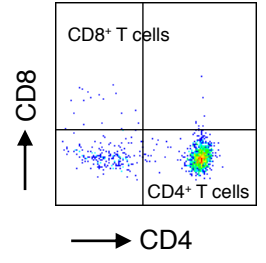**B**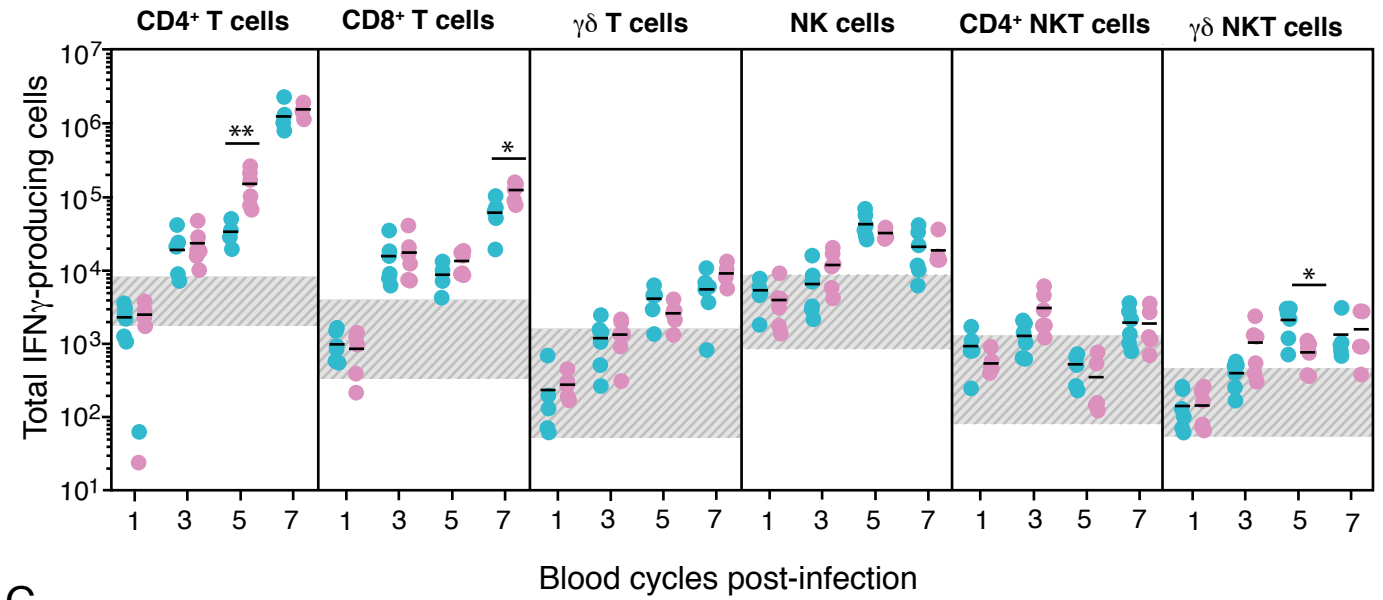**C**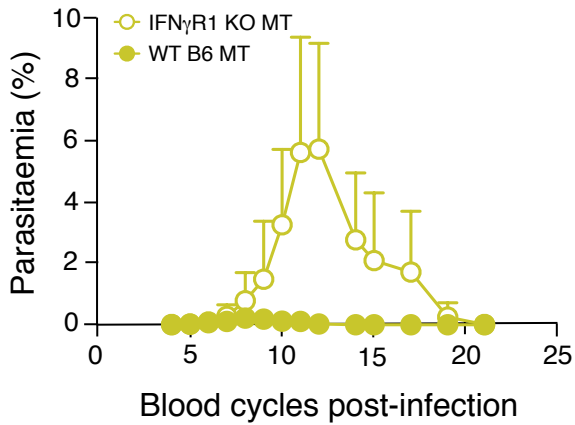

Supplement: mmc10.pdf [file mmc10.pdf]
